# Supplementary material
Source: PubMed Central journal article supplement (PMC1964837)
Supplement: pnas_0703012104_2.pdf [file pnas_0703012104_2.pdf]

Helix 1

Helix 2

Helix 3

|                     |      |                         |   |     |                 |           |         |       |                   |                    |       |       |           |                         |      |
|---------------------|------|-------------------------|---|-----|-----------------|-----------|---------|-------|-------------------|--------------------|-------|-------|-----------|-------------------------|------|
| <i>Hs</i> MARK1     | 324  | T E P D P D F N D T K R | I | D I | M V T M - G F A | - - R D E | I       | N D   | A L               | I N Q K Y D E V M  | A     | T Y I | L         | L G R K P P E F E G G E | 379  |
| <i>Rn</i> MARK2     | 317  | V E P L P D Y K D P R R | T | E L | M V S M - G Y T | - - R E E | I       | Q D S | L                 | V G Q R Y N E V M  | A     | T Y L | L         | L G Y K S S E L E G D T | 372  |
| <i>Hs</i> MARK3     | 320  | V E P E L D I S D Q K R | I | D I | M V G M - G Y S | - - Q E E | I       | Q E S | L                 | S K M K Y D E I T  | A     | T Y L | L         | L G R K S S E L D A S D | 375  |
| <i>Hs</i> MARK4     | 323  | T E P E E D F G D T K R | I | E V | M V G M - G Y T | - - R E E | I       | K E S | L                 | T S Q K Y N E V T  | A     | T Y L | L         | L G R K T E E G G D R G | 378  |
| <i>Hs</i> BRSK1     | 329  | G E L D P D V           | L | E S | M A S L - G C F | R D R E R | L       | H R E | L                 | R S E E E N Q E K  | M     | I Y Y | L         | L L D R K               | 385  |
| <i>Hs</i> BRSK2     | 296  | E D I D P D V           | L | D S | M H S L - G C F | R D R N K | L       | L Q S | L                 | L S E E E N Q E K  | M     | I Y F | L         | L L D R K               | 341  |
| <i>Hs</i> QSK       | 343  | D P L N E D V           | L | L A | M E D M - G L D | - - K E Q | T       | L Q S | L                 | R S D A Y D H Y S  | A     | I Y S | L         | L C D R H               | 386  |
| <i>Hs</i> SIK       | 302  | G D Y D E Q A           | L | G I | M Q T L - G V D | - - R Q R | T       | V E S | L                 | Q N S S Y N H F A  | A     | I Y Y | L         | L L E R L               | 345  |
| <i>Hs</i> QIK       | 294  | G E F N E Q V           | L | R L | M H S L - G I D | - - Q Q K | T       | I E S | L                 | Q N K S Y N H F A  | A     | I Y F | L         | L V E R L               | 338  |
| <i>Sc</i> Snf1      | 342  | D E I D D N L           | V | N I | L S S T M G Y E | - - K D E | I       | Y E S | L                 | E S S E D T // R D | A     | Y M L | I         | K E N K S               | 391  |
| <i>Hs</i> MELK      | 280  | I H L D D D C           | V | T E | L V H H - R N N | - - R Q T | M       | E D L | I                 | S L W Q Y D H L T  | A     | T Y L | L         | L A K K                 | 324  |
| <i>Hs</i> SNRK      | 289  | N L S E E E H           | I | Q R | M V - L G D I A | - - R D A | I       | V E   | A L               | E T N R Y N H I T  | A     | T Y F | L         | L A E R I               | 324  |
| <i>Hs</i> Rad23A(1) | 160  | G S E Y E T M           | L | T E | I M S M - G Y E | - - R E R | V       | V A   | A L               | R A S Y N N P H R  | A     | V E Y | L         | L T G I P               | 203  |
| <i>Hs</i> Rad23A(2) | 317  | T P Q E K E A           | I | E R | L K A L - G F P | - - E S L | V       | I Q   | A Y               | F A C E K N E N L  | A     | A N F | L         | L S Q N F               | 363  |
| <i>Sc</i> Dsk2      | 329  | E E R Y E H Q           | L | R Q | L N D M - G F F | - D F     | D R N   | V A   | A L               | R R S G G S V Q G  | A     | L D S | L         | L N G D V               | 373  |
| <i>Sc</i> Ede1      | 1339 | T T P K S L A           | V | E E | L S G M - G F T | - - E E E | A       | H N   | A L               | E K C N W D L E A  | A     | I N F | L         | L D S A                 | 1381 |
| <i>Hs</i> BMSC-UbP  | 335  | Q S Q W Q P Q           | L | Q Q | L R D M - G I Q | - D D E   | L S L R | A L   | Q A T G G D I Q A | A                  | L E L | I     | F A G G A | 379                     |      |
| <i>Sp</i> Mud1      | 292  | T D P G L N K           | I | A Q | L V S M - G F D | - - P L E | A       | A Q   | A L               | D A A N G D L D V  | A     | A S F | L         | L                       | 332  |
