# Supplementary material
Source: PubMed Central journal article supplement (PMC1964837)

A

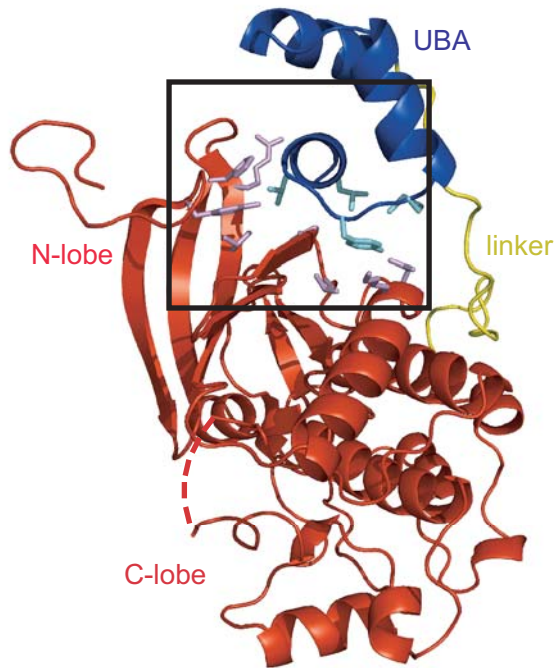

B

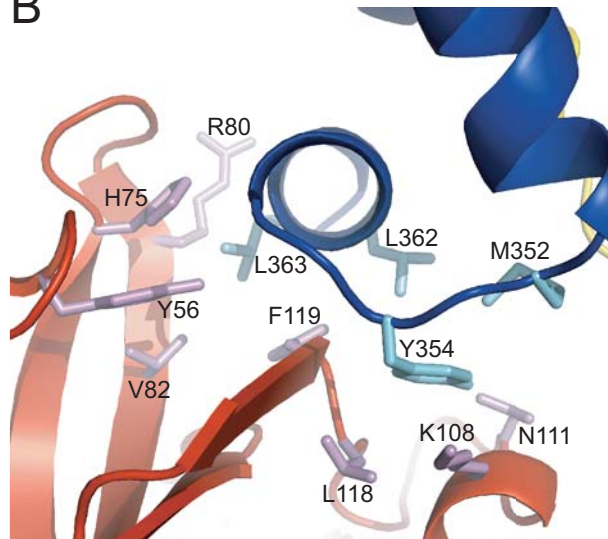

Supplement: pnas_0703012104_1.pdf [file pnas_0703012104_1.pdf]

Ubiquitin

Dsk2p UBA  
domain

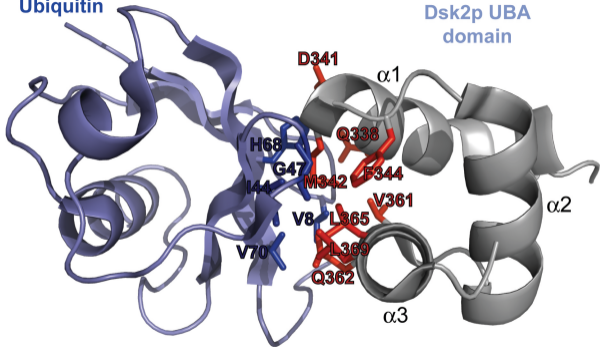

Supplement: pnas_0703012104_3.pdf [file pnas_0703012104_3.pdf]

**A**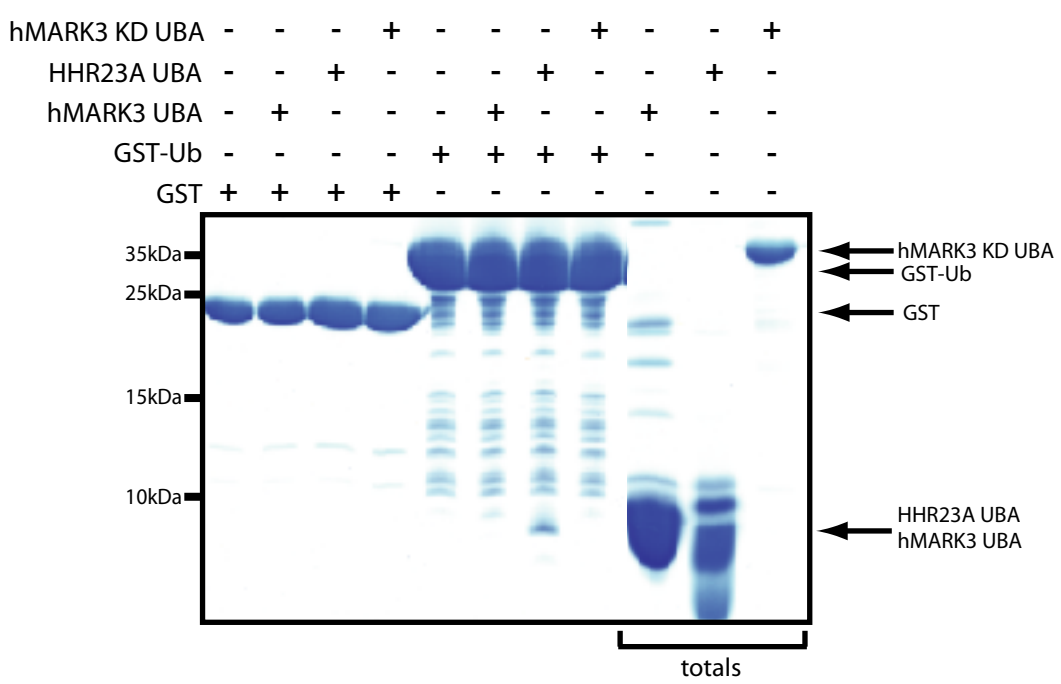**B**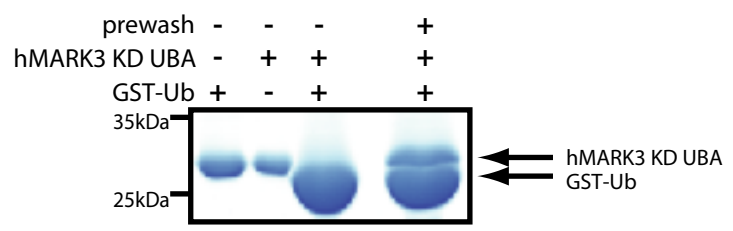**C**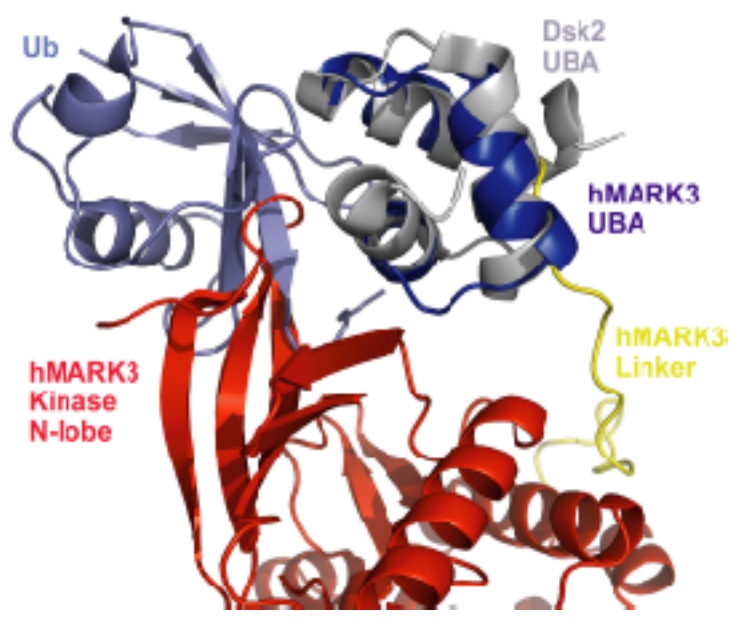

Supplement: pnas_0703012104_4.pdf [file pnas_0703012104_4.pdf]
